# Supplementary material for: Resistance and resilience of stream metabolism to high flow disturbances
Source: Copernicus journal article supplement (doi:10.5194/bg-2020-304), 2020-10-14
Supplement: Supplementary file [file bg-2020-304-RC1-supplement.pdf]

2 **General comments:**

3 The authors analyse the effects of 15 isolated storm events on stream metabolism, focusing on  
4 subsidy-stress hypotheses and drivers of response and recovery. The authors make use of a five-  
5 year high-temporal resolution dataset to address their four hypotheses. While the general ideas  
6 and approach are interesting and worthy of study, the current manuscript requires major revisions  
7 before publication. Some of the suggested revisions are substantial changes to analysis and fall  
8 more into the “reject and resubmit” category, but the authors of course can provide adequate  
9 justification for not conducting these changes.

10 **Specific comments:**

11 *Major:*

- 12 1. After reviewing the approach and the data, and because it underlies all results in the  
13 paper, I think the authors need to present a stronger rationale (which currently does not  
14 exist)—or change the approach—for how they arrived at their use of arbitrary discharge  
15 thresholds (e.g., 50%, 10%) in discriminating the “isolated events”. An option could be a  
16 simple sensitivity analysis. Additional rationale should support the use of cumulative  
17 daily discharge, as opposed to other commonly used metrics in hydrology for event  
18 detection. I further think using cumulative discharge may be obscuring some results and  
19 indeed missing many events. I first started down this path of inquiry because only 15  
20 isolated events over five years seemed to be a small sample size. Would the same  
21 thresholds result in different events if applied to depth or even comparing maximum daily  
22 discharge as opposed to cumulative daily discharge? This, I realize, may be a bit of a task  
23 because it requires an entirely new analysis, but I think that the authors need to consider  
24 this route and defend their assertions more fully. If more events could be used based on a  
25 simple adjustment like threshold choice, there could be a much more robust sample size  
26 to draw inference from, and would make this a much stronger paper.
- 27 2. Similarly, I think this paper could be much stronger by including as many events as  
28 possible, regardless of whether they are “isolated”. As discussed in the Introduction, the  
29 pulsing paradigm/pulsing equilibrium would seem to include the pulses of hydrologic

30 fluxes, whereas the presented approach discounts them. I understand that perhaps the  
31 authors were particularly interested in capturing “resilience” metrics, which may require  
32 a period of calm after the storm, so to speak. But, one can imagine a much richer analysis  
33 if, for example, the authors calculated some kind of “resistance” metric for as many  
34 events as possible, but parsing which ones were preceded by large events. And, for  
35 “resilience”, the authors could still calculate the time to return to pre-(initial)event  
36 conditions, but just parse which of these “initial” events had subsequent events. Without  
37 much effort, the authors could even estimate the subsequent rate of events and its  
38 influence on “resilience”. One can imagine a figure of, for example,  $\Delta GPP$  vs.  $\Delta Q$  where  
39 points are colored by their recovery time and sized by their subsequent rate of events. I  
40 mention these suggestions because the current methods seemed disingenuous in taking an  
41 arbitrarily “neat” approach to this potentially very fruitful test of the pulsing paradigm.  
42 Another important point in this regard is how to take into account *when* a rain event  
43 occurs during the day. For example, if a rain event occurs at 23h, it seems like your  
44 approach considers its effect for the previous day, when it is probably more appropriate  
45 to consider its effect starting for the following day. (This is understood by the authors in  
46 their approach in section 2.5.1, but their simple correlation approach does not effectively  
47 get at this idea). The current approach also likely discounts many possible events for this  
48 reason. I am aware that this may be a big ask of the authors, and, if different routes are  
49 taken, I still suggest that they provide stronger rationale for the (apparently) arbitrary  
50 decision for identifying events.

- 51 3. In the same vein, the authors should provide some kind of justification or sensitivity  
52 analysis for both of their critical choices in calculation of their resistance/resilience  
53 metrics. The first is the choice of “...three days prior to define a range of antecedent  
54 metabolism for each isolated flow event.” (Lines 140–141). The second is the choice of  
55 defining “X prior [as] the maximum or minimum value of GPP or ER from the  
56 antecedent range...” (Lines 147–148). Why not the median or mean, which would  
57 represent more of the “equilibrium” of the previous period? And why not use the most  
58 similar previous day in terms of driving forces—in particular, light availability (this seems  
59 especially relevant for the recovery interval!). I’m sure the authors considered such  
60 options in their initial work, but they need to do more work to convince the audience of

61 their presented approach—or take a different one if the evidence from sensitivity analyses  
62 suggests that they should. Both of these choices are major factors in the subsequent  
63 analyses because they define the metrics used, and because these choices do not appear to  
64 have literature support/precedent, they need to have clear rationale.

65 4. Lines 154–156: “To quantify the resilience of GPP and ER, we estimated recovery  
66 intervals (RI) by counting the number of days until metabolic rates returned to within the  
67 range of pre-event values, signifying a return to antecedent dynamic equilibrium (Figure  
68 3).” This is a good illustration of a potential issue/untapped possibility with the current  
69 approach. If you look at the data for the event shown in Figure 3, depth increases in that  
70 event by approximately 0.12 m, which decreases light availability by approximately 13%  
71 (according to exponential attenuation). This is nearly exactly the difference between GPP  
72 on 7 February and 9 February, both of which had nearly identical incoming light signals  
73 (making them comparable).

74 5. Lines 157–160: “To ensure additional flow events did not obscure the recovery interval  
75 of GPP or ER, we stopped counting RI the day before the next event (i.e., if another flow  
76 event happened four days later, we stopped counting RI at 3 days), and have noted this in  
77 our results as days+ and used different symbols in data figures.” Why? As far as I can  
78 tell, the authors throw these data points out in their analysis, and only reference them in  
79 Table 3 (which already uses asterisks to note the issue). Is this to note that the system was  
80 on its way to “recovery”? Maybe it would be better to just show a recovery rate, instead  
81 of a time, which could result in more data points being included. So, instead of the time it  
82 takes to get back to some baseline (which I argue above is a bit arbitrary), you can  
83 calculate the rate of increase in GPP over a period (which could be equal to the baseline  
84 period that you settle on). Let’s say an event occurs and on that day GPP was  $5 \text{ g O}_2 \text{ m}^{-2}$   
85  $\text{d}^{-1}$ ; the subsequent days maybe it’s 8, then  $10 \text{ g O}_2 \text{ m}^{-2} \text{ d}^{-1}$ . The rate of increase could  
86 then be  $2.5 \text{ g O}_2 \text{ m}^{-2} \text{ d}^{-2} ((10 - 5) / 2)$ . Then, even if a subsequent event occurs, you can  
87 still compare the rate of increase before that event. A rate also seems like it could be  
88 more comparable/scalable across systems in contrast with a number of days. I don’t  
89 presume to have the best idea here, but I think an approach like the one outlined above  
90 could increase inclusion of useful data points, and thereby lead to more useful inferences.

- 91 6. Lines 165–166: “We assessed three categories of potential predictors of metabolic  
92 resistance and resilience: antecedent conditions, characteristics of the isolated flow event,  
93 and characteristics of the most recent prior flow event.” Antecedent conditions and  
94 characteristics of the recent prior flow event (especially the latter) are unrelated to any  
95 stated hypothesis and appear to come out of nowhere. There needs to be clear rationale in  
96 the Introduction that leads the reader to understand why you are doing this.
- 97 7. Generally speaking, I had difficulty with the entire Results section, which I think needs a  
98 complete rewrite. Some specific details are presented below, but I glossed over several in  
99 the interest of time. This section needs to link to stated hypotheses (in the order that they  
100 are stated in the Introduction) and test them directly without including spurious tests and  
101 weak assertions.
- 102 8. Figure 5 as presented is not informative. What do the authors want the reader to  
103 understand from this figure? Is the  $R^2$  based on a linear regression for all of the points or  
104 just the black circles? What is the slope of the regression and the p-value? How does the  
105 slope compare to the 1:1 lines? The second panel (right, ER vs GPP recovery interval) is  
106 not related to any stated hypothesis. The text discussing this Figure does not support the  
107 points on the figure, particularly for the high stated value of ER stimulation = 0.22 (Lines  
108 189–190: “...The magnitude of departure for ER ( $M_{ER}$ ) ranged from -0.59 to 0.22, with  
109 a median of 0.”). Looking at this figure also raises red flags about how the authors  
110 defined stimulation/repression. How do the extremely small changes in magnitude shown  
111 here compare to the uncertainty in GPP/ER, which are never discussed or propagated  
112 through any of these analyses? For example, is a 1% increase (i.e.,  $M = 0.01$ ) detectable  
113 if uncertainty is considered? The authors should improve this figure substantially, or  
114 remove it/leave it as a table. One possible idea is to color or size points based on the  
115 event size. Moreover, based on this figure, I am not sure I believe the results on Line  
116 193–195 (italics mine): “Although GPP exhibited stronger responses across isolated flow  
117 events than ER,  $M_{GPP}$  and  $M_{ER}$  were positively correlated ( $R^2 = 0.39$ ,  $p = 0.007$ ,  
118 Figure 5) and not significantly different ( $p = 0.06$ ,  $\alpha = 0.05$ ).” Just an eyeball test makes  
119 this seem unreasonable. ER magnitudes on average are about 0
- 120 9. Figure 6 is not easily understood and appears to simply repeat the information on Table 4  
121 in a cluttered way. What key piece of information is the reader supposed to understand

122 from this? The results of the controls on process response in this section 3.3 is quite  
123 difficult to connect with any prior hypotheses and leaves the reader uninformed. There  
124 are two figures and a table with only six sentences to describe them in this section. One  
125 of the stated hypotheses (H2) is never even formally tested here, and only the resistance  
126 metric is tested for H3 (somewhat, in Figure 7), which included both resistance and  
127 resilience metrics.

128 10. As far as the Discussion and Conclusion, I have many comments, but the issues all stem  
129 from previous issues relating to hypotheses, methods, and results. If the authors apply any  
130 of my suggested revisions to their approach, they will inevitably have to rewrite these  
131 sections. So, I have not provided many specific comments out of the interest of time, but  
132 a few key ones are here. I again suggest to organize the Discussion (and entire document)  
133 in order of the hypotheses as they are presented and as makes logical sense. As written,  
134 the Discussion jumps around in its assertions and ideas. Finally, much of the content in  
135 these sections is hypothetical and rhetorical, with little critical analysis of the results  
136 actually presented in the manuscript and how they relate to the broader literature.

137 **Minor:**

138 1. Ideas of pulsing steady state could be clarified a bit with regard to the study design and  
139 terminology throughout. In the Introduction, the authors note “Frequent disturbances  
140 generate oscillations that form a pulsing steady state (sensu Odum et al. 1995) that  
141 includes ambient variability in processes (Resh et al., 1988; Stanley et al., 2010).” (Lines  
142 21–23). So, flow disturbance regime defines the pulsing steady state of lotic systems.  
143 But, the authors then use—incorrectly I think—the periods outside of flow disturbance to  
144 define a “pulsing steady state” (or at times, “pulsing equilibrium”, like in Figure 1, and  
145 “dynamic equilibrium”, like in Figure 3, and “antecedent equilibrium” on Line 187), to  
146 which they then compare to periods *with* flow disturbance. The approach is clear, but  
147 there is some circular reasoning with respect to the definition of pulsing steady state. I  
148 recommend perhaps using different terminology for these two concepts. One idea could  
149 be to use something like “ambient equilibrium” for metabolism under baseflow  
150 conditions, and “pulsing equilibrium” to refer to the larger scale, (inter)annual behaviour  
151 of as originally conceived by Odum. I think these small changes would improve the  
152 clarity of the study design and arguments within.

- 153 2. Similarly, I do not think that “resilience” is appropriately used throughout the manuscript,  
154 first defined by the authors on Lines 59–60: “We can also quantify post-disturbance  
155 ecosystem responses by estimating resilience: the time it takes for a process returns to  
156 equilibrium following a disturbance (Carpenter et al., 1992).” We have first of all the  
157 issue of “return[ing] to equilibrium”, which is not so clear based on the previous  
158 definition of a pulsed equilibrium that includes disturbance. In a system organized by  
159 regular disturbance regimes, the idea of resilience to that same disturbance regime is a bit  
160 convoluted. In contrast, the idea of a “recovery interval” to previous ambient conditions  
161 is clear and appropriate. Resilience in this context might make more sense if there were  
162 alternative metabolic equilibria that the stream could occupy, where each of these  
163 equilibria were tolerant to different levels disturbance. Ultimately, this is a choice of  
164 language and does not affect the analyses presented and if the authors opt to keep their  
165 current choice, I suggest spending some more time to expand these ideas/defend their use  
166 out in the Introduction and Discussion.
- 167 3. Line 73: “(H0) some flow events will not push GPP and ER outside of their pulsing  
168 equilibrium.” Should this be “(H4)”? Or is this some kind of null hypothesis? Consider  
169 renumbering, or placing this at the beginning of the sentence—seems strange to go from  
170 1–3 then back to 0.
- 171 4. Lines 70–71: “...(H2) there will be a stimulation of GPP and ER at intermediate flow  
172 disturbances due to an influx of limiting carbon and nutrients...”. Is this stream known to  
173 be limited by carbon and nutrients? What is the timeframe for stimulation? It seems like  
174 the influx of carbon and nutrients would pass through the system quite quickly in this  
175 small stream, and would not be easily acquired/processed by organisms. In larger systems  
176 with long recession curves, I think this perspective can make sense, but this hypothesis  
177 does not seem well supported in the Introduction as currently written.
- 178 5. Lines 71–72: “...(H3) metabolic resistance and resilience will change with the size of the  
179 event, with larger flow disturbances inducing more stress due to enhanced scour...” The  
180 point about scour here seems important. Scour is a function of shear stress, which itself is  
181 a linear function of depth. The authors focus on discharge as their subsidy/stress driver,  
182 but I wonder if water depth would be more appropriate? Because depth only increases to  
183 the square-root of discharge (for a large range of depth-discharge in their Supplemental

184 data), a quadrupling of discharge only results in a doubling of benthic shear stress. I don't  
185 expect for the authors to redo any analyses with this perspective, but I do think this kind  
186 of information would be useful to include especially in the Discussion so that future  
187 works would consider this as well. It also could be used as a future framework to further  
188 test the idea of subsidy/stress balance. Depth is a first-order control on both light  
189 availability and shear stress at the benthos, making it a more appropriate indicator of  
190 stress than discharge.

191 6. The light data (first referred to on lines 92–93) appear to be in units of  $\mu\text{A}$  according to  
192 the supplementary material (“ODonnellHotchkiss\_SuppData\_ReadMe.pdf”, under point  
193 “1”). I am not familiar with this unit (is it micro-amperes?) for sunlight, and I think this  
194 needs some clarification. The light data in the data file itself appear to range between 0  
195 and 1, but the *streammetabolizer* model take data in PAR (units  $\mu\text{mol m}^{-2} \text{s}^{-1}$ ), which can  
196 be upwards of 1000 by noontime. I'm sure this is not a major issue, but I do not think the  
197 results will be replicable as currently presented—those units, if fed into  
198 *streammetabolizer*, will lead to very strange outputs I think. The sensor used (according  
199 to O'Donnell and Hotchkiss 2019) is a Campbell CS300, which should output data in  
200 typical units like  $\text{W m}^{-2}$ .

201 7. Line 140: “To acknowledge the pulsing, day-to-day variability...” I don't think “pulsing”  
202 is appropriate or needed here.

203 8. Line 152: “...suppression...” please check for the consistent use of suppression and  
204 repression (and others) throughout.

205 9. In section 3.2 “Metabolic resistance and resilience”, it would be very helpful to explicitly  
206 organize/label these paragraphs according to your numbered hypotheses from the  
207 Introduction. For example, Lines 187–192: There is no directly stated connection  
208 between any of the statements presented here and the actual hypotheses.

209 10. Lines 194–196 bring up another issue with the idea of “magnitude” (italics mine): “*M*  
210 *GPP was less than MER for nearly all flow events, except for one in which M GPP and*  
211 *M ER were both zero and two where M GPP and M ER were both small (Figure 5,*  
212 *Figure 195 A19).”* The general idea of magnitude is that is not directional. I would argue  
213 that the magnitude of GPP response was *greater* than that of ER, and that they both had

- 214 similar directional change (decrease in process magnitude). Consider different language  
215 throughout.
- 216 11. Lines 198–199: “Similarly, the only other event that stimulated GPP ( $M\text{ GPP} = 0.03$ ) had  
217 no ER response, suggesting many flow disturbances may decouple GPP and ER.” This  
218 seems like an unsupported assertion (which should be in the Discussion, if anywhere)  
219 based on one event with an extremely small signal.
- 220 12. Table 3: n/a is not clearly defined.
- 221 13. Lines 208–209: “Although GPP and ER are linked processes, the variables that were  
222 moderate or strong predictors of resistance or resilience ( $r > 0.5$ ).” Why is 0.5 the  
223 threshold for being a strong predictor? That’s only 25% of the variance explained.
- 224 14. Lines 210–211: “Because the median RI ER was zero, bivariate correlations could not be  
225 used to determine potential predictors of ER resilience.” Another reason to consider rate  
226 instead of day count.
- 227 15. Lines 214–215: “Overall, there were multiple environmental controls on metabolic  
228 resistance or resilience that were strongly correlated with either GPP or ER, but no  
229 significant drivers of both GPP and ER resistance and resilience.” This is not supported  
230 by the figure or the table.
- 231 16. Line 219: “Notably, ER was more resistant than GPP (Figure 1).” Figure 1 is a  
232 conceptual figure and does not support this statement.
- 233 17. Line 239–240: “In assessing metabolic responses and recovery from smaller flow events  
234 relative to the dynamic equilibrium of metabolism at baseflow, we found some of the  
235 shortest metabolic recovery intervals recorded in the literature (Figure 8; Table A1).” Do  
236 these other studies use the exact same methodology as you? How are they comparable?  
237 Are they similar sized streams? You should compare and contrast more here.
- 238 18. Line 259–260: “Contrary to our predictions, the size of the most recent antecedent flow  
239 disturbance had a positive relationship with  $M\text{ GPP}$  and  $M\text{ ER}$  (Figure A19).” Where is  
240 this prediction?

## 241 **19. Technical corrections:**

- 242 1. Equation 1 (Line 110) seems boiler-plate and unnecessary.
- 243 2. There are extra parentheses in Figure 2c description for “ $((m^3\text{ d}^{-1}))$ ”
- 244 3. Figure 3 should describe what the error bars are on the GPP estimates.



- 245 4. Lines 163–164: “Quantifying how different antecedent conditions induce variable  
246 responses from GPP and ER is critical to furthering our understanding of stream  
247 ecosystem responses to flow disturbances.” This belongs in the Introduction, not the  
248 Methods.
- 249 5. Lines 167–168: “Antecedent medians for turbidity were estimated from seven days prior  
250 due to missing sensor data.” This is not clear, please explain what this means. There was  
251 always missing data for turbidity within the three days prior to an event? I can’t imagine  
252 turbidity changes very much at baseflow.
- 253 6. Lines 190–191: “Three of 15 flow events stimulated ER, 5 repressed ER, and ER did not  
254 deviate from the antecedent equilibrium for 7 events (i.e., M ER was 0).” It’s more  
255 common to use numerals for numbers greater than 10, and to spell the numbers out for  
256 numbers less than 10.
